# Supplementary material
Source: Springer Nature journal article supplement (https://www.springermedizin.de/resource/supplementary/12955_2009_646_MOESM1_ESM.pdf/9560988)
Supplement: MOESM1 [file 9560988]

1022 abstracts located

839 abstracts excluded: search terms not in  
838, 1 duplicated

183 abstracts

126 abstracts excluded  
following ranking

57 articles reviewed

9 articles excluded  
following review

38 Diabetes mellitus, type  
2 articles

10 Alzheimer's disease  
articles
